# Supplementary material
Source: Research Square preprint supplement (doi:10.21203/rs.3.rs-8857709/v1)
Supplement: Supplementary file 1 [file a8cbbd7e18d77358a895a205.docx]

**Sup Table 1 The lesion site distribution of patients with LM in different groups.**

| **Lesion site (numbers)** | | **Head** | **Neck** | **Trunk** | **Limbs** | **Unknown** | **χ2** | **P** |
| --- | --- | --- | --- | --- | --- | --- | --- | --- |
| **Gender** | |  |  |  |  |  | 57.55 | <0.001 |
| Male | | 1150 | 2213 | 4033 | 1686 | 14033 |  |  |
| Female | | 892 | 1838 | 2528 | 1312 | 10174 |  |  |
| **Age** | |  |  |  |  |  | 378.01 | <0.001 |
| <1 years old | | 289 | 899 | 827 | 272 | 1142 |  |  |
| 1-3 years old | | 909 | 1699 | 2826 | 1459 | 4161 |  |  |
| 4-6 years old | | 449 | 814 | 1654 | 682 | 1803 |  |  |
| 7-12 years old | | 333 | 550 | 1124 | 513 | 1287 |  |  |
| 13-18 years old | | 62 | 89 | 130 | 72 | 162 |  |  |
| **Treatment method** | |  |  |  |  |  |  |  |
| Sclerotherapy | Yes | 1320 | 1998 | 1869 | 1726 | 5114 | 1785.55 | <0.001 |
|  | No | 722 | 2053 | 4692 | 1272 | 3441 |  |  |
| Surgical resection | Yes | 504 | 1419 | 2431 | 1117 | 2198 | 339.48 | <0.001 |
|  | No | 1538 | 2632 | 4130 | 1881 | 6357 |  |  |

**Sup information: The number of included cases in each hospital**

1. Northeast China: Harbin Children’s Hospital (N=240) , Changchun Children’s Hospital (N=27) , Shenyang Children’s Hospital (N=48) , Dalian Children’s Hospital (N=533)
2. North China: Beijing Children’s Hospital (N=1286) , Hebei Children’s Hospital (N=995) , Beijing Children's Hospital Shunyi Women’s and Children’s Hospital (N=18) , Inner Mongolia Maternity and Child Health Hospital (N=13) , Baoding Children’s Hospital (N=390) , Shanxi Children’s Hospital (N=584) , Changzhi Maternity and Child Health Hospital (N=19)
3. East China: Jinan Children’s Hospital (N=1398) , Liaocheng Children’s Hospital (N=21) , Nanjing Children’s Hospital (N=2146) , Changzhou Children’s Hospital (N=37) , Wuxi Children’s Hospital (N=139) , Suzhou University Affiliated Children’s Hospital (N=531) , Hangzhou Children’s Hospital (N=109) , Anhui Children’s Hospital (N=1449), Xuzhou Children’s Hospital (N=1683) , Jiangxi Children’s Hospital (N=1478) , Ganzhou Maternity and Child Health Hospital (N=96) , Jiujiang Maternity and Child Health Hospital (N=71) , Fuzhou Children’s Hospital (N=243)
4. South China: Liuzhou Maternity and Child Health Hospital (N=236) , Shenzhen Children’s Hospital (N=1431)
5. Central China: Wuhan Children’s Hospital (N=1061) , Hunan Children’s Hospital (N=2162) , Zhengzhou Children’s Hospital (N=1636)
6. Northwest China: Xinjiang Uygur Autonomous Region Children’s Hospital (N=138) , Urumqi Children’s Hospital (N=109) , Gansu Maternity and Child Health Hospital (N=214) , Yinchuan Maternity and Child Health Hospital (N=7) , Qinghai Maternity and Child Health Hospital (N=96) , Xi’an Children’s Hospital (N=1786)
7. Southwest China: Kunming Children's Hospital (N=1662) , Guiyang Maternity and Child Health Hospital (N=115)
